# Supplementary material for: Surfactant location and internal phase volume fraction dictate emulsion electrospun fiber morphology and modulate drug release and cell response
Source: Royal Society of Chemistry journal article supplement (doi:10.1039/d0bm01751e), 2021-01-01
Supplement: d0bm01751e1.pdf [file d0bm01751e1.pdf]

There is no supplementary information available for this article
